# Supplementary material
Source: PubMed Central journal article supplement (PMC5514679)
Supplement: AEM.00832-17_zam999117961s1.pdf [file AEM.00832-17_zam999117961s1.pdf]

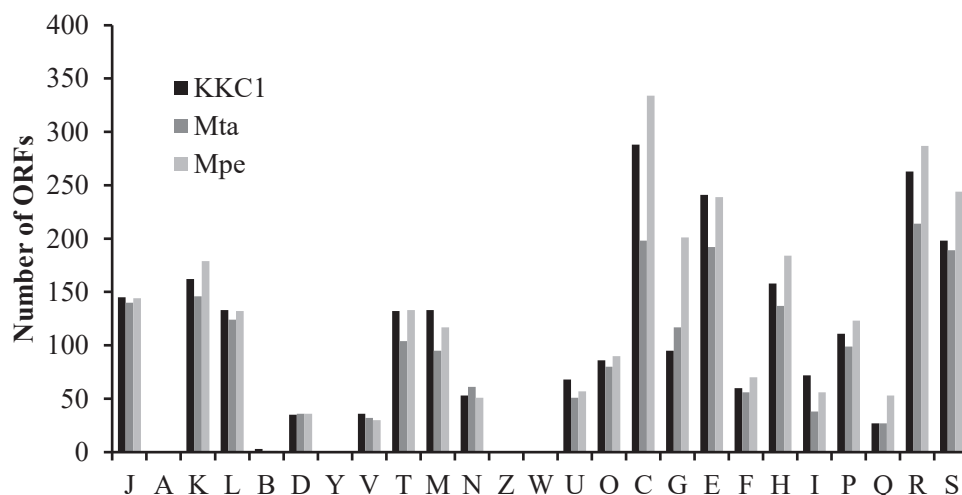

**Fig. S1. Numbers of ORFs associated with the general Clusters of Orthologous Groups (COG) functional categories.**

KKC1, *Calderihabitans maritimus* KKC1 (3,509 ORFs); Mta, *Moorella thermoacetica* (2,463 ORFs); Mpe, *Moorella perchloratireducens* (3,349 ORFs). Functional categories: A, RNA processing and modification; B, chromatin structure and dynamics; C, energy production and conversion; D, cell cycle control, cell division, and chromosome partitioning; E, amino acid transport and metabolism; F, nucleotide transport and metabolism; G, carbohydrate transport and metabolism; H, coenzyme transport and metabolism; I, lipid transport and metabolism; J, translation, ribosomal structure, and biogenesis; K, transcription; L, replication, recombination, and repair; M, cell wall/membrane/envelope biogenesis; N, cell motility; O, posttranslational modification, protein turnover, chaperones; P, inorganic ion transport and metabolism; Q, secondary metabolites biosynthesis, transport and catabolism; R, general function prediction only; S, function unknown; T, signal transduction mechanisms; U, intracellular trafficking, secretion, and vesicular transport; V, defense mechanisms; W, extracellular structures; Y, nuclear structure; and Z, cytoskeleton.



**B**

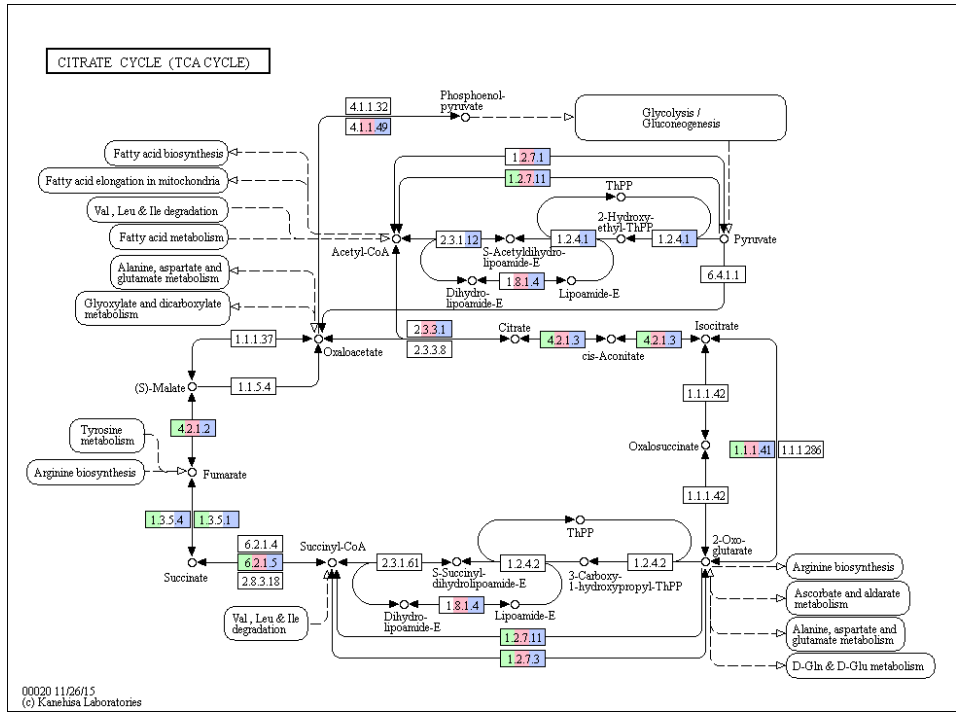





E

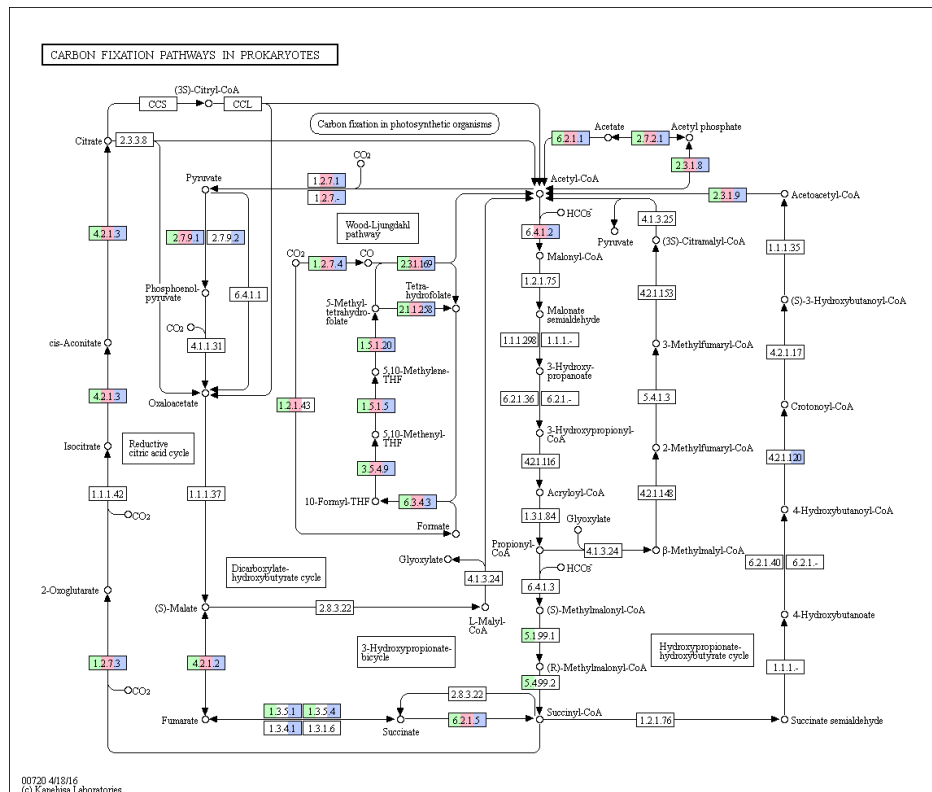

**Fig. S2. Comparison of metabolic pathways in *C. maritimus* KKC1, *M. thermoacetica*, *M. perchloratireducens*.**

A. glycolysis and gluconeogenesis. B. TCA cycle. C. Pyruvate metabolism. D. fructose and mannose metabolism. E. Carbon fixation pathways in Prokaryotes. Green, *C. maritimus*; red, *M. thermoacetica*; blue, *M. perchloratireducens*. The empty box indicates that there are no ORFs assigned. Pathway maps were generated by KEGG.

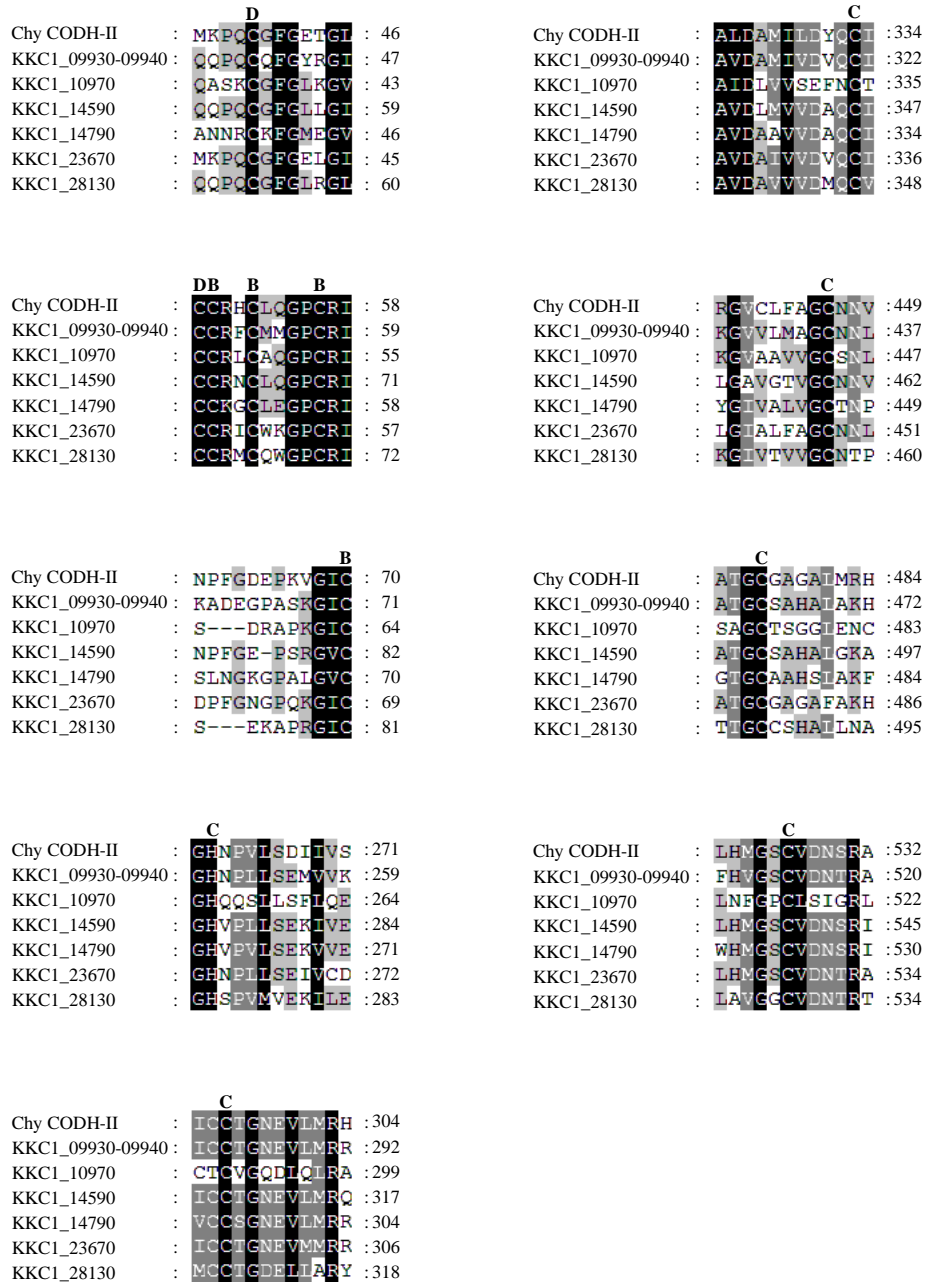

**Figure S3. Alignment of amino acid sequences for CooSs from *C. hydrogenoformans* (CODH-II) and *C. maritimus* KKC1.**

Conserved residues are indicated with a black background. Residues conserved in >80% and >60% of the proteins examined are indicated with a white type on a dark gray background and by a black type on a light gray background, respectively. Residues linking Clusters B, D, and C are indicated by black type on top.

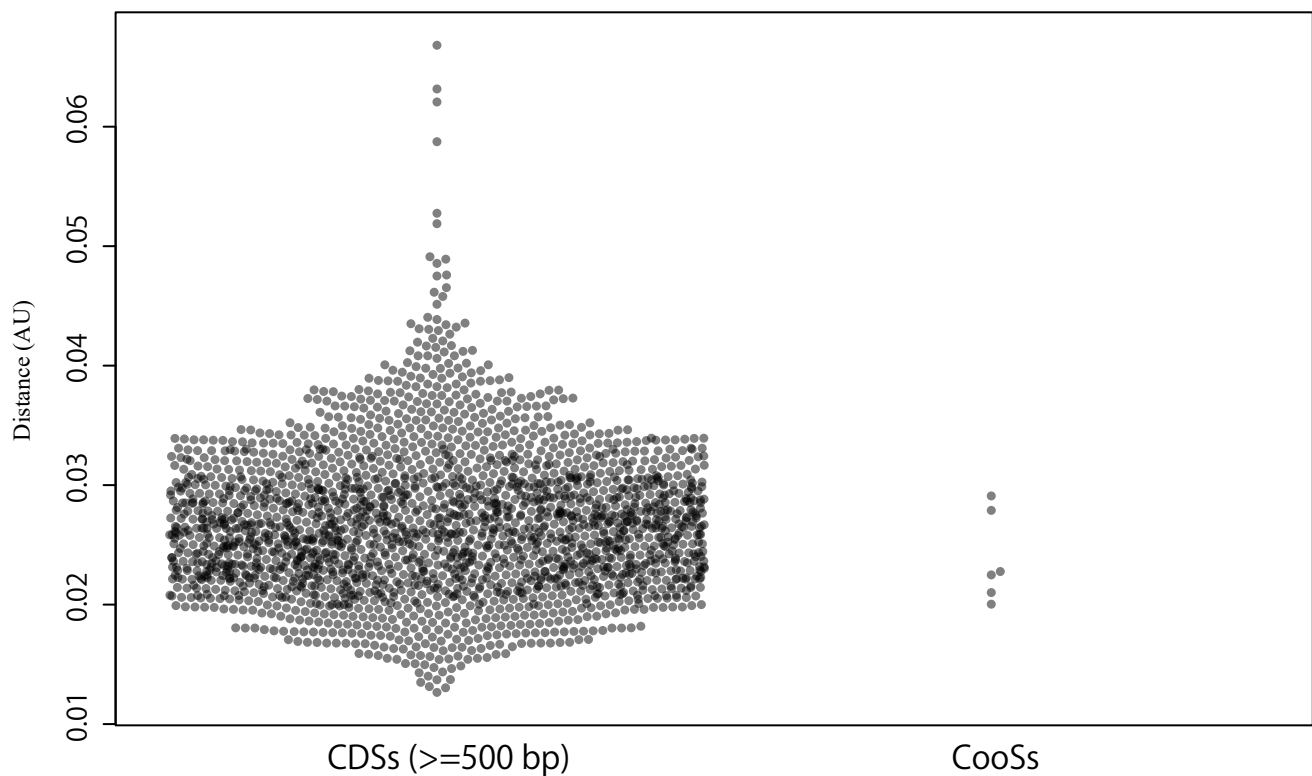

**Fig. S4. Distances of CDS tetranucleotide frequency to that of the whole *C. maritimus* KKC1 genome.** Left column: CDSs greater equal than 500 bp. Right column: six cooS genes (KKC1\_09930-40, KKC1\_10970, KKC1\_14590, KKC1\_14790, KKC1\_23670, KKC1\_28130). Distances are expressed in arbitrary units (AU).



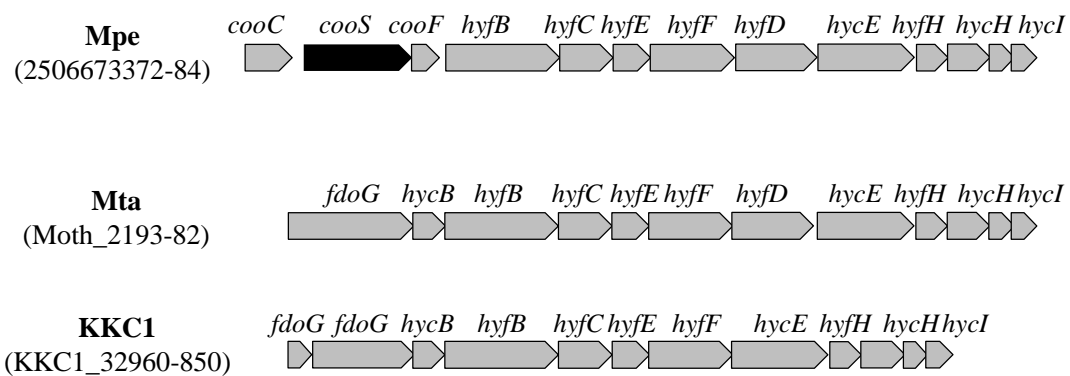

**Figure S5. Schematic representation of *hyf/hyc*-type ECH gene clusters from *C. maritimus* KKC1, *Moorella thermoacetica* and *Moorella perchloratireducens*. KKC1, *C. maritimus*; Mta, *M. thermoacetica*; Mpe, *M. perchloratireducens*. Black, *cooS*; gray, other functional protein.**

**Table S1. CDSs made up of COGs found in pyruvate:ferredoxin oxidoreductase.**

| KKC1 <sup>a</sup> |         |                       |                           | Mta <sup>a</sup>       |         |                       |                           | Mpe <sup>a</sup>        |         |                       |                           |
|-------------------|---------|-----------------------|---------------------------|------------------------|---------|-----------------------|---------------------------|-------------------------|---------|-----------------------|---------------------------|
| Locus tag         | COG     | K number <sup>b</sup> | Subunit name <sup>b</sup> | Locus tag              | COG     | K number <sup>b</sup> | Subunit name <sup>b</sup> | Locus tag <sup>c</sup>  | COG     | K number <sup>b</sup> | Subunit name <sup>b</sup> |
| KKC1_06220        | COG0674 | K00174                | korA                      | Moth_0033              | COG0674 | K00174                | korA                      | 2506673660              | COG1146 | K00176                | korD                      |
| KKC1_06230        | COG1013 | K00175                | korB                      | Moth_0034              | COG1013 | K00175                | korB                      | 2506673661              | COG1014 | K00177                | korC                      |
| KKC1_06240        | COG1014 | K00177                | korC                      | Moth_0035              | COG1014 | K00177                | korC                      | 2506673662              | COG1013 | K00175                | korB                      |
|                   |         |                       |                           | Moth_0036              | COG1149 | K00176                | korD                      | 2506673663              | COG0674 | K00174                | korA                      |
| KKC1_10900        | COG1146 | K00176                | korD                      |                        |         |                       |                           |                         |         |                       |                           |
| KKC1_10910        | COG0674 | K00174                | korA                      | Moth_1983              | COG1149 | K00176                | korD                      | 2506674734              | COG0674 | K00174                | korA                      |
| KKC1_10920        | COG1013 | K00175                | korB                      | Moth_1984              | COG0674 | K00174                | korA                      | 2506674735              | COG1013 | K00175                | korB                      |
| KKC1_10930        | COG1014 | K00177                | korC                      | Moth_1985              | COG1013 | K00175                | korB                      | 2506674736              | COG1146 | K00176                | korD                      |
|                   |         |                       |                           | Moth_1986              | COG1014 | K00177                | korC                      | 2506674737              | COG1014 | K00177                | korC                      |
| KKC1_14030        | COG0674 | K00174                | korA                      |                        |         |                       |                           |                         |         |                       |                           |
| KKC1_14040        | COG1013 | K00175                | korB                      |                        |         |                       |                           | 2506675637              | COG2221 | K00176                | korD                      |
| KKC1_14050        | COG1146 | K00176                | korD                      |                        |         |                       |                           | 2506675638              | COG0674 | K00174                | korA                      |
| KKC1_14060        | COG1014 | K00177                | korC                      |                        |         |                       |                           | 2506675639              | COG1013 | K00175                | korB                      |
|                   |         |                       |                           |                        |         |                       |                           | 2506675640              | COG1014 | K00177                | korC                      |
| KKC1_15100        | COG1146 | K00176                | korD                      |                        |         |                       |                           |                         |         |                       |                           |
| KKC1_15110        | COG0674 | K00174                | korA                      |                        |         |                       |                           |                         |         |                       |                           |
| KKC1_15120        | COG1013 | K00175                | korB                      |                        |         |                       |                           |                         |         |                       |                           |
| KKC1_15130        | COG1014 | K00177                | korC                      |                        |         |                       |                           |                         |         |                       |                           |
| KKC1_21110        | COG0674 | K00174                | korA                      |                        |         |                       |                           |                         |         |                       |                           |
| KKC1_21120        | COG1013 | K00175                | korB                      |                        |         |                       |                           |                         |         |                       |                           |
| KKC1_21130        | COG1014 | K00177                | korC                      |                        |         |                       |                           |                         |         |                       |                           |
| KKC1_21140        | COG1146 | K00176                | korD                      |                        |         |                       |                           |                         |         |                       |                           |
| KKC1_27530        | COG1146 | K00176                | korD                      |                        |         |                       |                           |                         |         |                       |                           |
| KKC1_27540        | COG1014 | K00177                | korC                      |                        |         |                       |                           |                         |         |                       |                           |
| KKC1_27550        | COG1013 | K00175                | korB                      |                        |         |                       |                           |                         |         |                       |                           |
| KKC1_27560        | COG0674 | K00174                | korA                      |                        |         |                       |                           |                         |         |                       |                           |
|                   |         |                       |                           | Moth_0064 <sup>d</sup> | COG0674 | K00169                | porA                      | 2506673623 <sup>e</sup> | COG0674 | K00169                | porA                      |
|                   |         |                       |                           |                        | COG1014 | K00172                | porG                      |                         | COG1014 | K00172                | porG                      |
|                   |         |                       |                           |                        | COG1013 | K00170                | porB                      |                         | COG1013 | K00170                | porB                      |
|                   |         |                       |                           | Moth_0376              | COG1014 | K00172                | porG                      | 2506674258              | COG1144 | K00172                | porG                      |
|                   |         |                       |                           | Moth_0377              | COG1144 | K00171                | porD                      | 2506674259              | COG0674 | K00169                | porA                      |
|                   |         |                       |                           | Moth_0378              | COG0674 | K00169                | porA                      | 2506674260              | COG1013 | K00170                | porB                      |
|                   |         |                       |                           | Moth_0379              | COG1013 | K00170                | porB                      |                         |         |                       |                           |
|                   |         |                       |                           |                        |         |                       |                           | 2506674776              | COG1014 | K00172                | porG                      |
|                   |         |                       |                           | Moth_1591              | COG1013 | K00170                | porB                      | 2506674777              | COG1144 | K00171                | porD                      |
|                   |         |                       |                           | Moth_1592              | COG0674 | K00169                | porA                      | 2506674778              | COG0674 | K00169                | porA                      |
|                   |         |                       |                           | Moth_1593              | COG1014 | K00172                | porG                      | 2506674779              | COG1013 | K00170                | porB                      |
|                   |         |                       |                           | Moth_1921              | COG1013 | K00170                | porB                      | 2506675171              | COG1014 | K00172                | porG                      |
|                   |         |                       |                           | Moth_1922              | COG0674 | K00169                | porA                      | 2506675172              | COG1013 | K00170                | porB                      |
|                   |         |                       |                           | Moth_1923              | COG1144 | K00171                | porD                      | 2506675173              | COG0674 | K00169                | porA                      |
|                   |         |                       |                           | Moth_1924              | COG1014 | K00172                | porG                      | 2506675174              | COG1144 | K00171                | porD                      |
| KKC1_00050        | COG1014 | K00180                | iorB                      | Moth_0934              | COG1014 | K00180                | iorB                      | 2506674290              | COG1014 | K00180                | iorB                      |
| KKC1_16920        | COG1014 | K00180                | iorB                      | Moth_2276              | COG1014 | K00180                | iorB                      | 2506675897              | COG1014 | K00180                | iorB                      |

<sup>a</sup> KKC1, *Calderihabitans maritimus* KKC1; Mta, *Moorella thermoacetica*; Mpe, *Moorella perchloratireducens*.

<sup>b</sup> Description of KEGG Orthology. Kor, 2-oxoglutarate ( $\alpha$ -ketoglutarate):ferredoxin oxidoreductase; por, pyruvate:ferredoxin oxidoreductase; ior, indolepyruvate:ferredoxin oxidoreductase.

<sup>c</sup> Locus tag of *M. perchloratireducens* is represented by IMG Gene ID.

<sup>d</sup> Moth\_0064 is a fusion of three COGs, COG0674, COG1014, COG1013 (E. Pierce1, G. Xie, R. D. Barabote, E. Saunders, C. S. Han, J. C. Detter, P. Richardson, T. S. Brettin, A. Das, L. G. Ljungdahl and S. W. Ragsdale. Environ Microbiol 10:2550–2573. 2008.)

<sup>e</sup> This CDS showed 89% similarity with Moth\_0064.
